# Supplementary material for: A versatile gold synthon for acetylene C–H bond activation
Source: Royal Society of Chemistry journal article supplement (doi:10.1039/c0dt00276c), 2010-01-01
Supplement: c0dt00276c.pdf [file c0dt00276c.pdf]

## Electronic Supplementary Information for

### **A versatile gold synthon for acetylene C-H bond activation**

**George C. Fortman,<sup>a</sup> Albert Poater,<sup>b,c</sup> Jack W. Levell,<sup>d</sup> Sylvain Gaillard,<sup>a</sup> Alexandra  
M. Z. Slawin,<sup>a</sup> Ifor D. W. Samuel,<sup>d</sup> Luigi Cavallo,<sup>b</sup> and Steven P. Nolan<sup>\*a</sup>**

<sup>a</sup> *EaStCHEM School of Chemistry, University of St Andrews, St Andrews, Scotland, UK.*

*E-mail: snolan@st-andrews.ac.uk*

<sup>b</sup> *Dipartimento di Chimica, Università di Salerno, Via Ponte don Melillo, Fisciano (SA),  
I-84084, Italy*

<sup>c</sup> *Institut Català de Recerca de l'Aigua (ICRA), Parc Científic i Tecnològic, Universitat  
de Girona, Emili Grahit 101, E-17003, Girona, Spain*

<sup>d</sup> *School of Physics & Astronomy, University of St Andrews, St Andrews, Scotland, UK*

#### Table of Contents

|                                                |        |
|------------------------------------------------|--------|
| <sup>1</sup> H and <sup>13</sup> C NMR Spectra | S2-S15 |
| Crystallographic Data Table                    | S16    |

## Au-NMRs

### (IPr)-Au-CC-<sup>t</sup>Bu (**3a**) <sup>1</sup>H

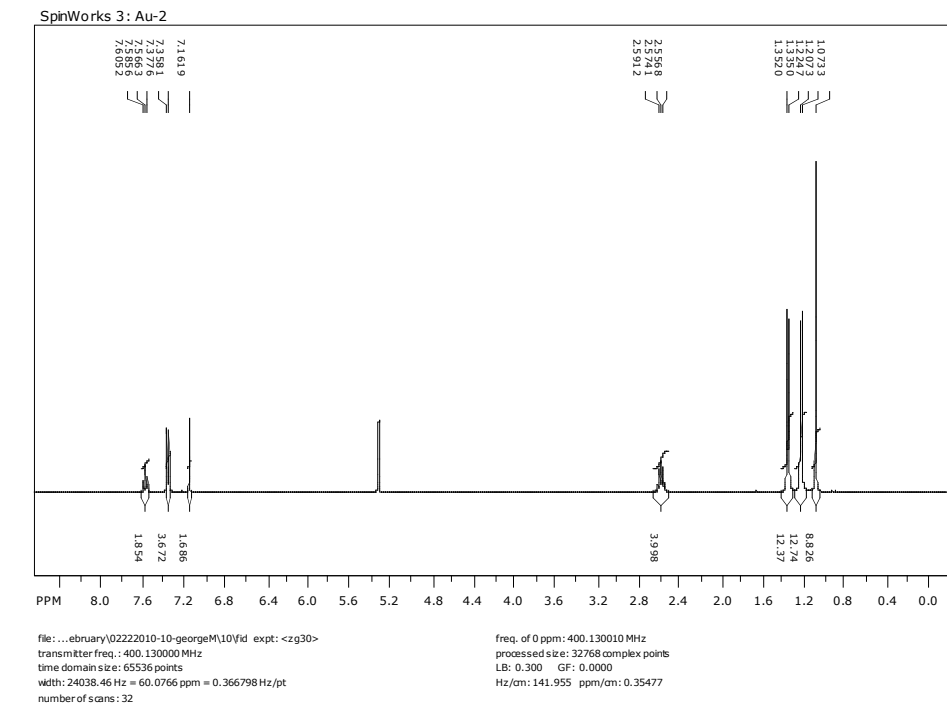

### <sup>13</sup>C

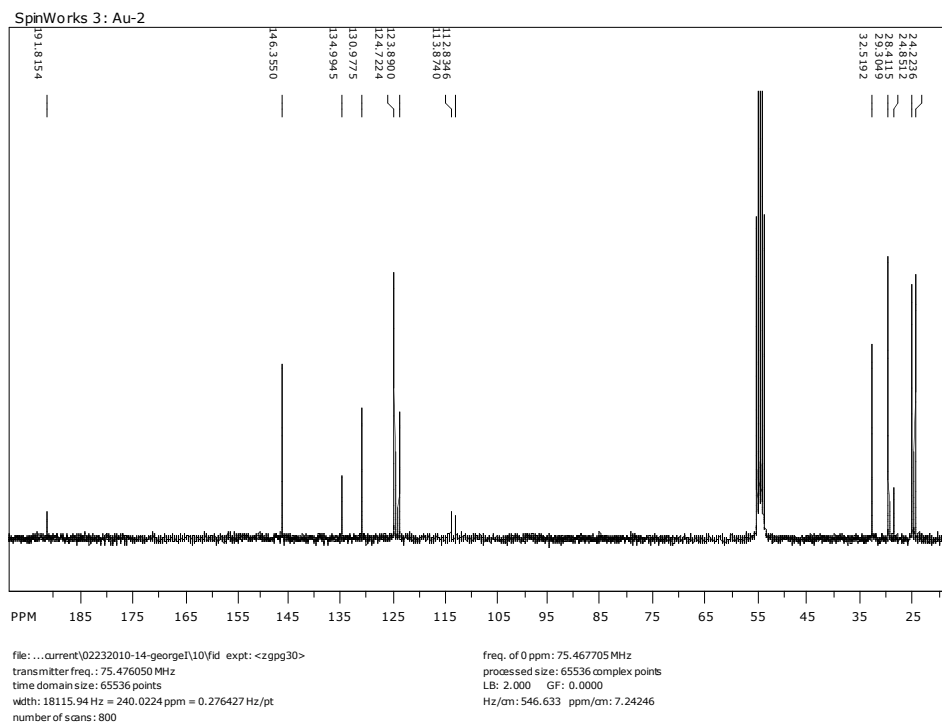

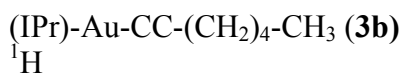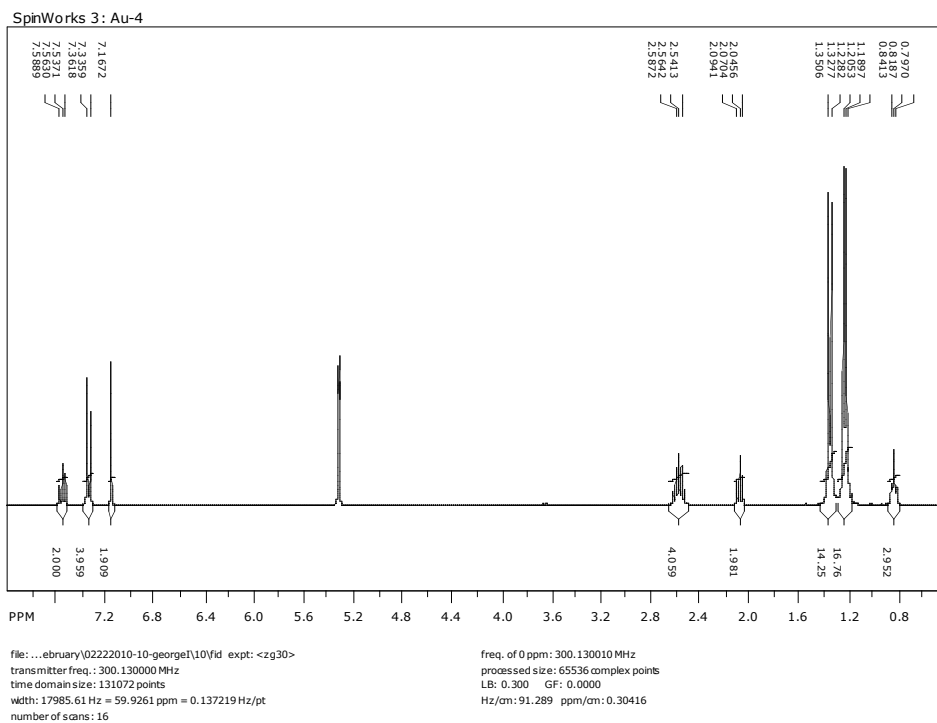

<sup>13</sup>C

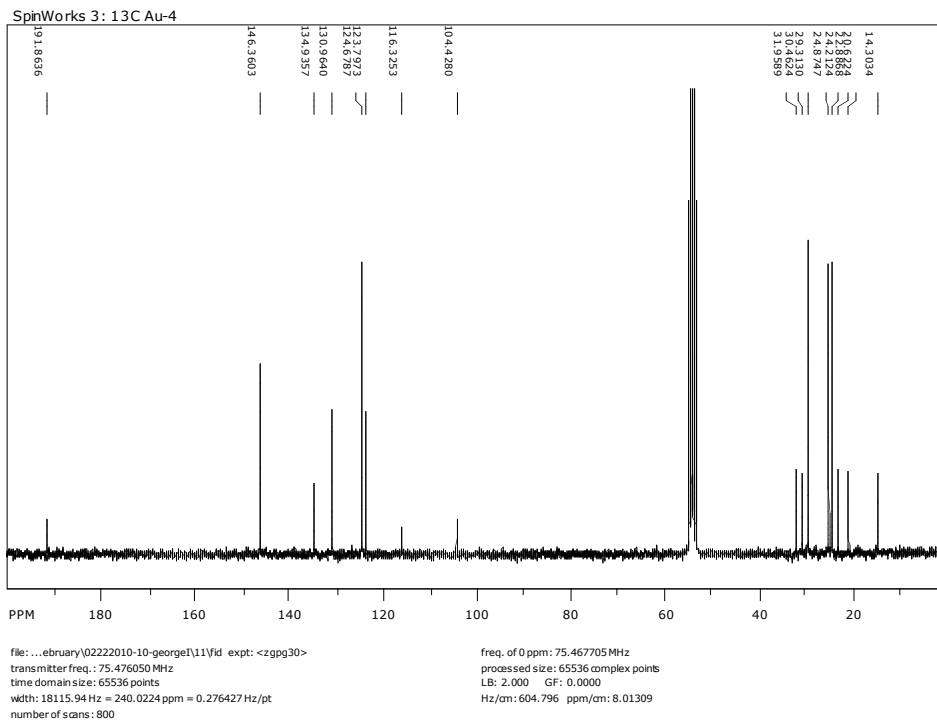

(IPr)-Au-CC-(CH<sub>2</sub>)<sub>3</sub>-CC-Au-(IPr) (**3c**)  
<sup>1</sup>H

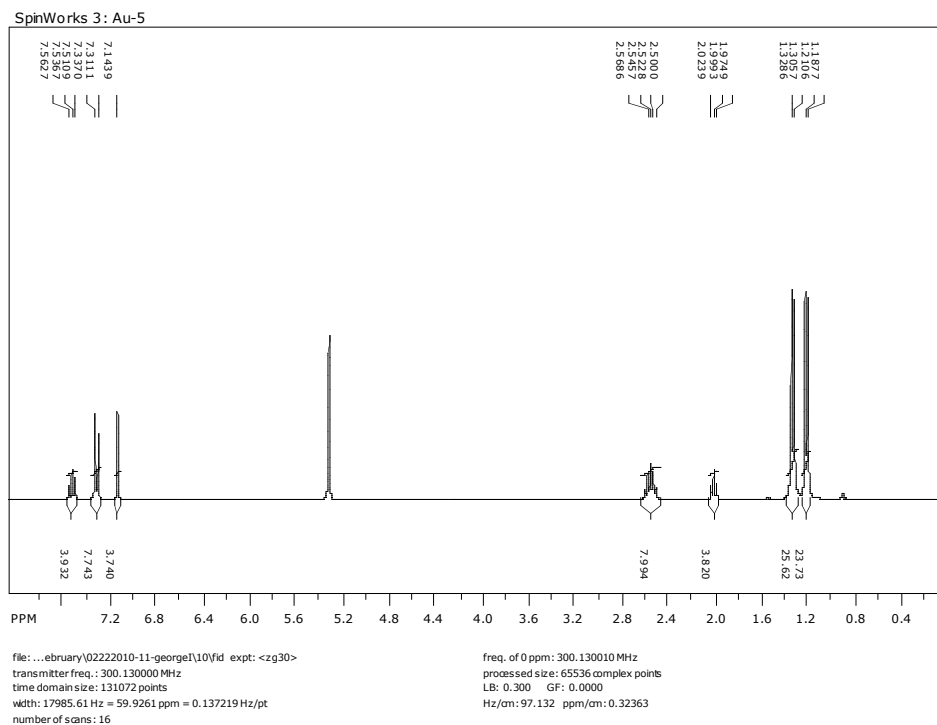

<sup>13</sup>C

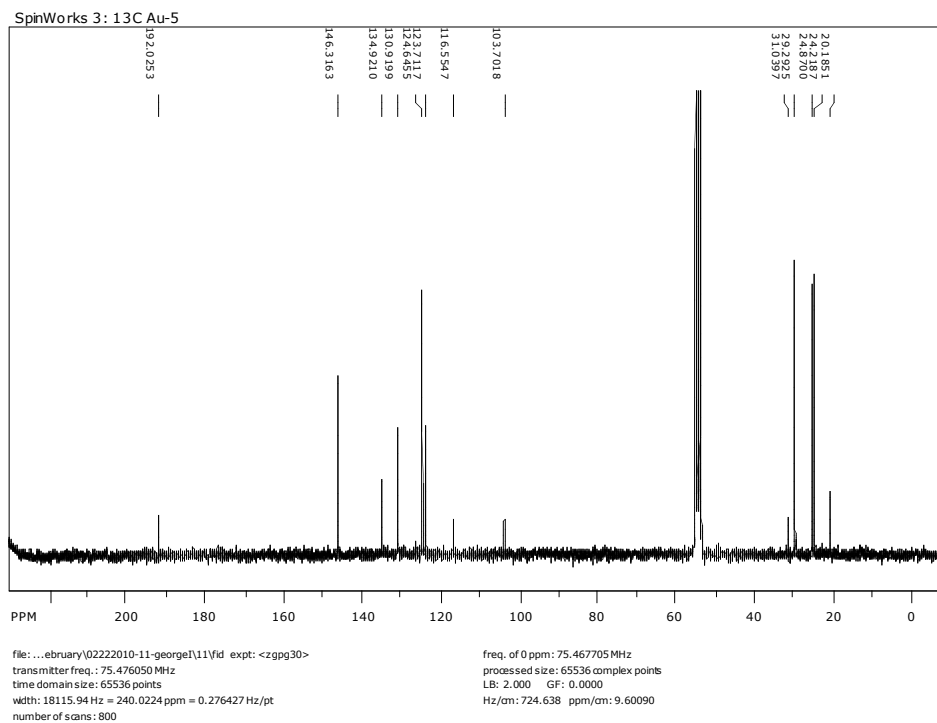

(IPr)-Au-CC-C(OH)(CH<sub>3</sub>)<sub>2</sub> (**3d**)

<sup>1</sup>H

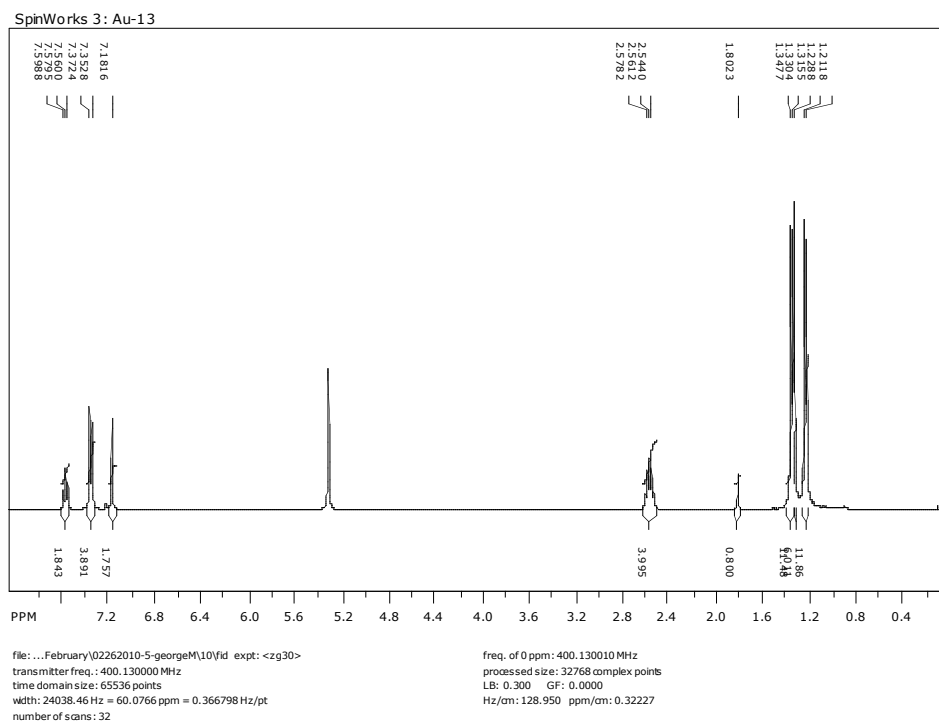

<sup>13</sup>C

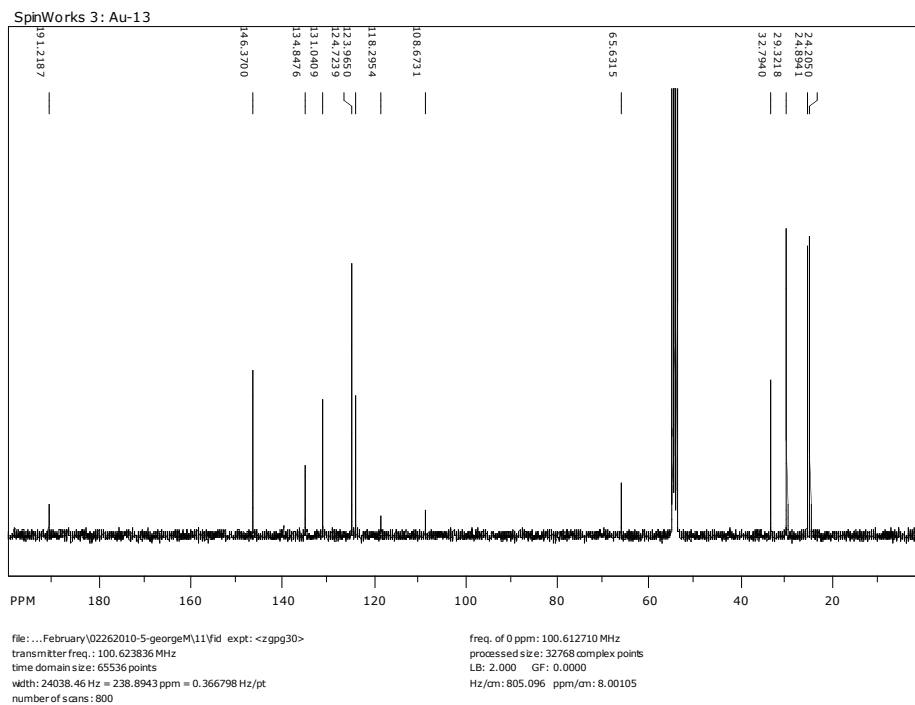

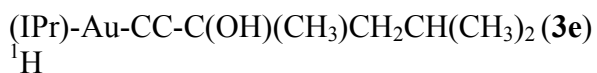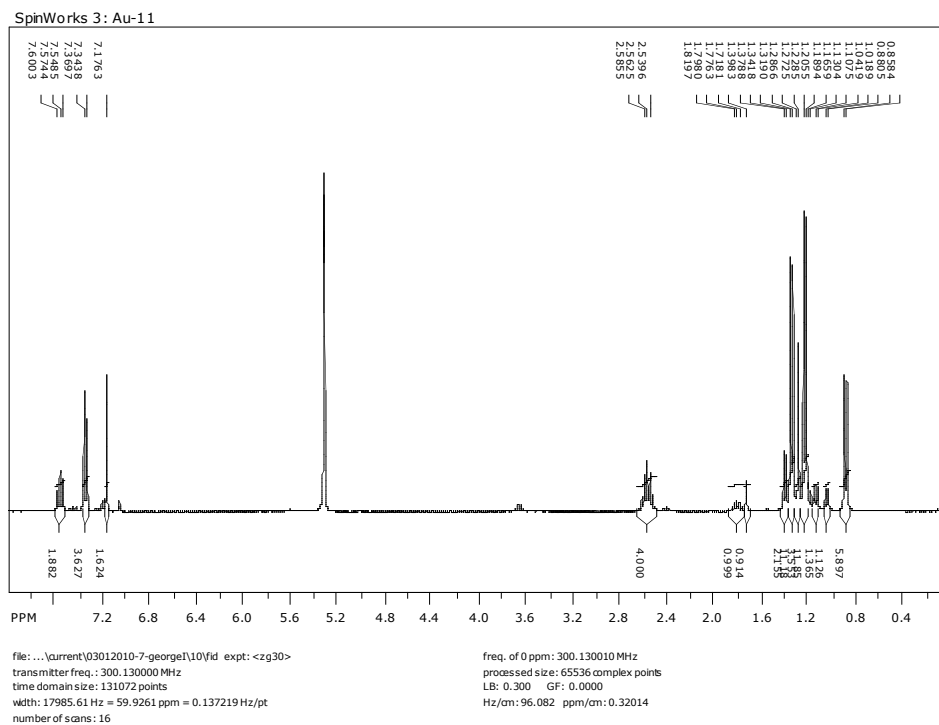

(IPr)-Au-CC-CH<sub>2</sub>CH<sub>2</sub>OH (**3f**)  
<sup>1</sup>H

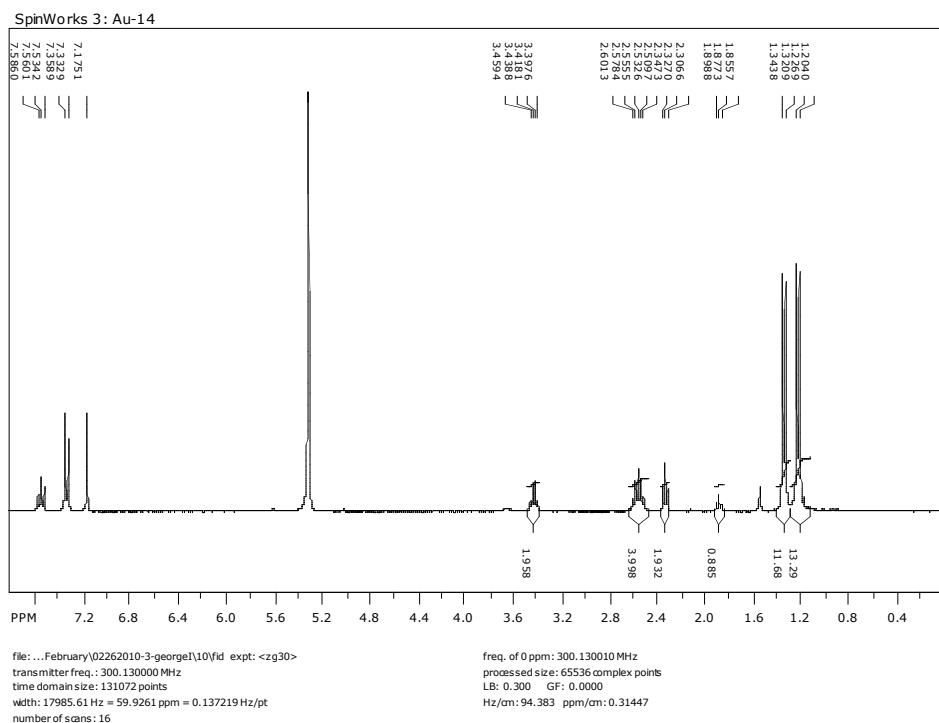

<sup>13</sup>C

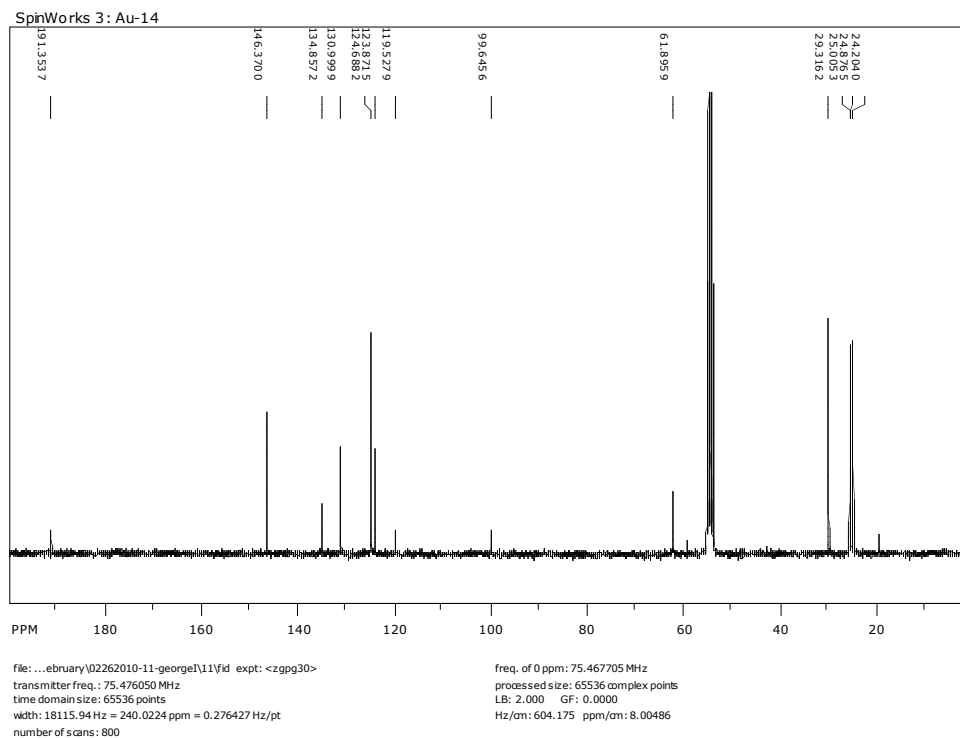

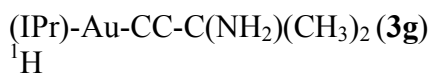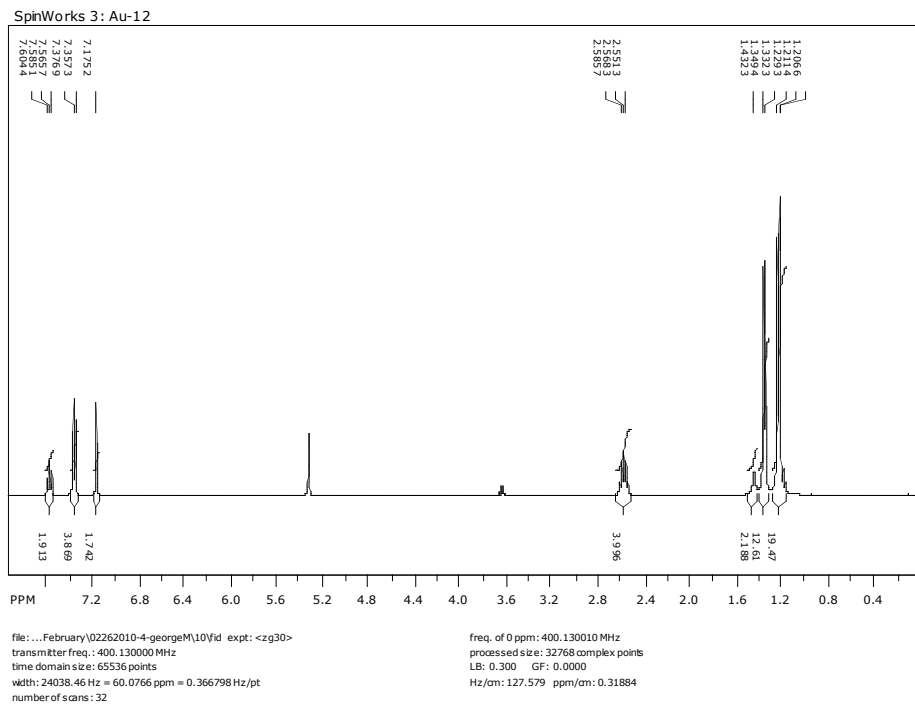

<sup>13</sup>C

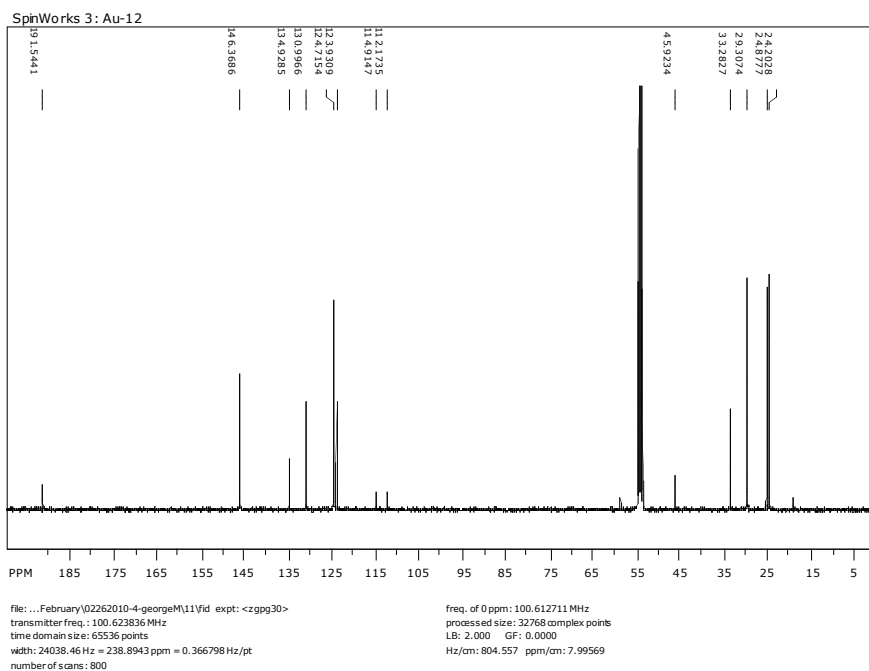



# 2-[(IPr)-Au-CC]-anisole <sup>1</sup>H

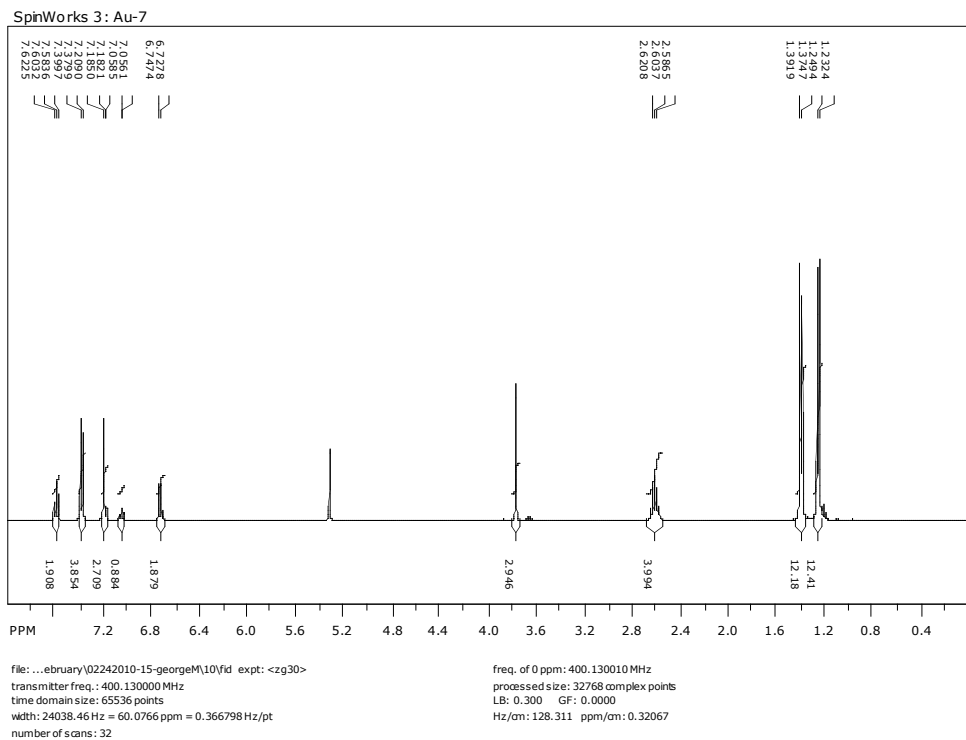

# <sup>13</sup>C

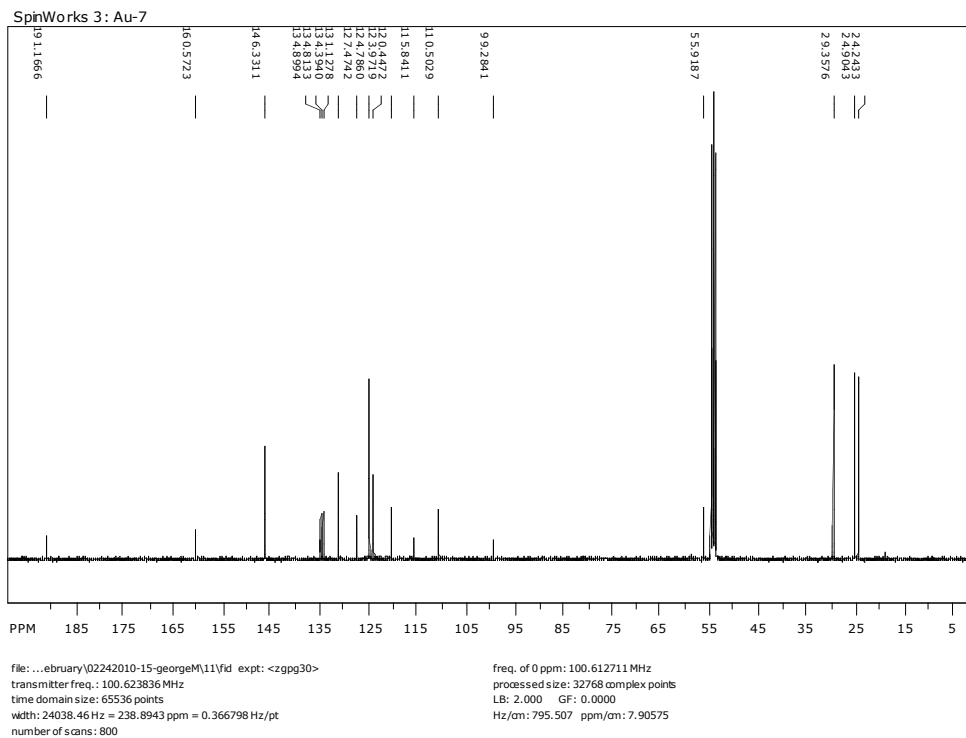

# 4-[(IPr)-Au-CC]-anisole <sup>1</sup>H

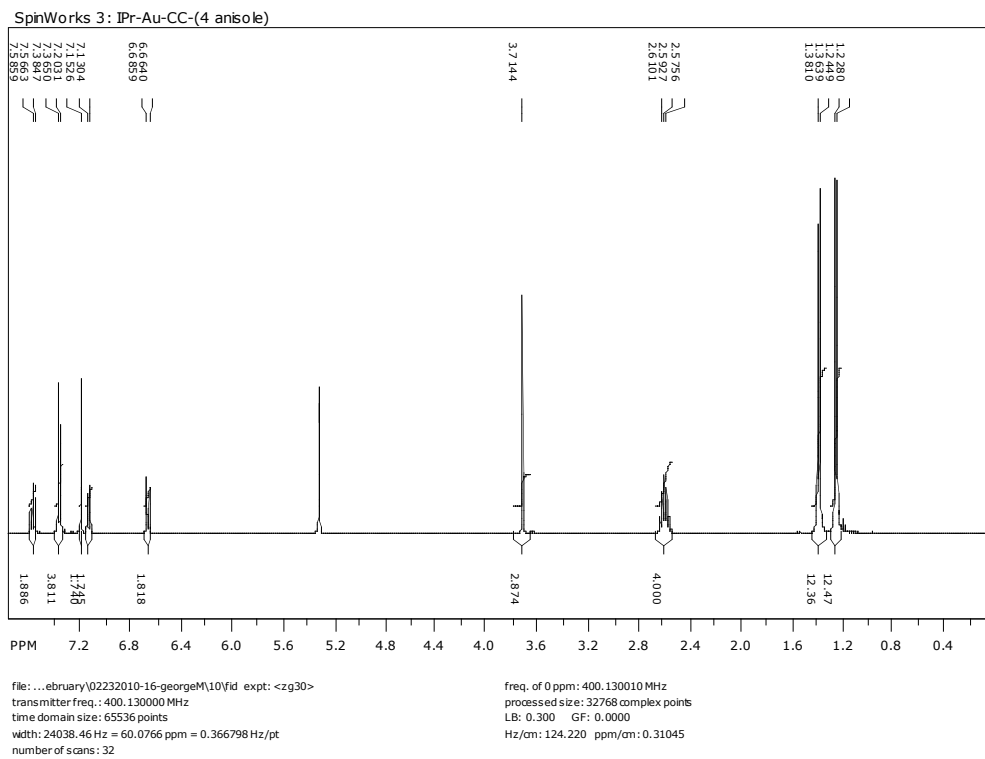

# <sup>13</sup>C

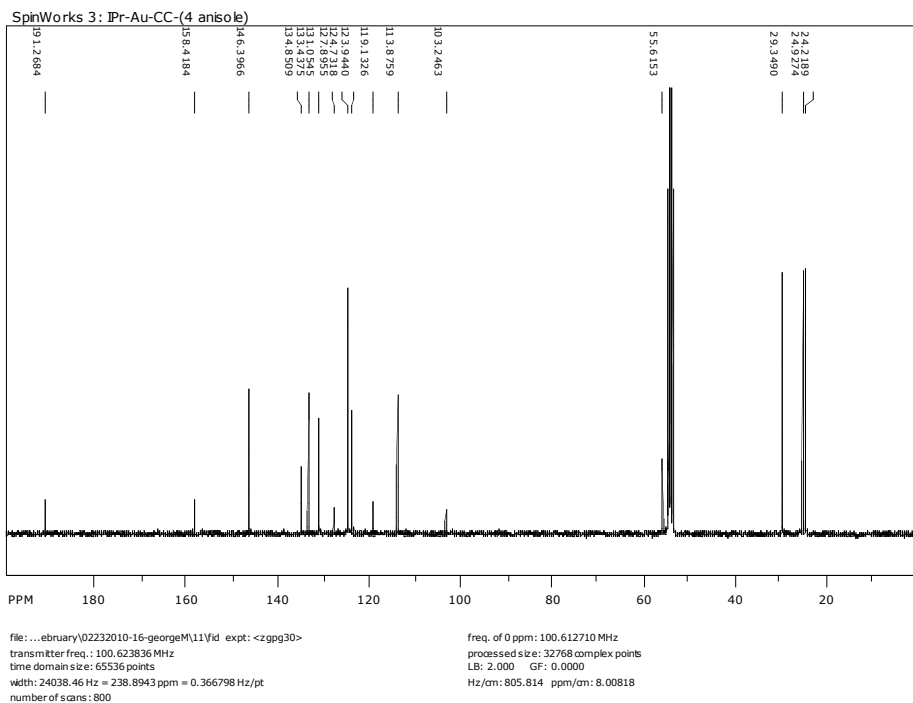

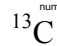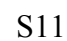

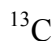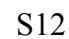

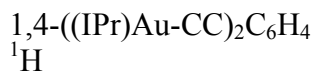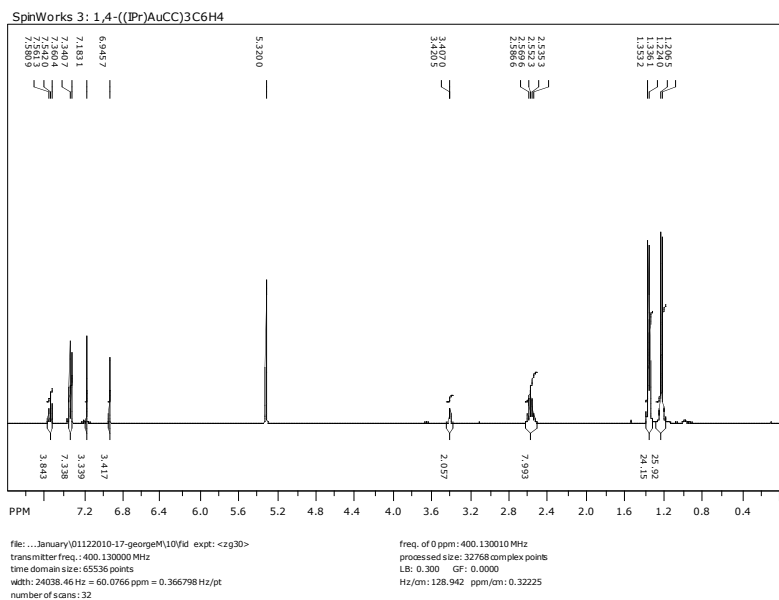

<sup>13</sup>C

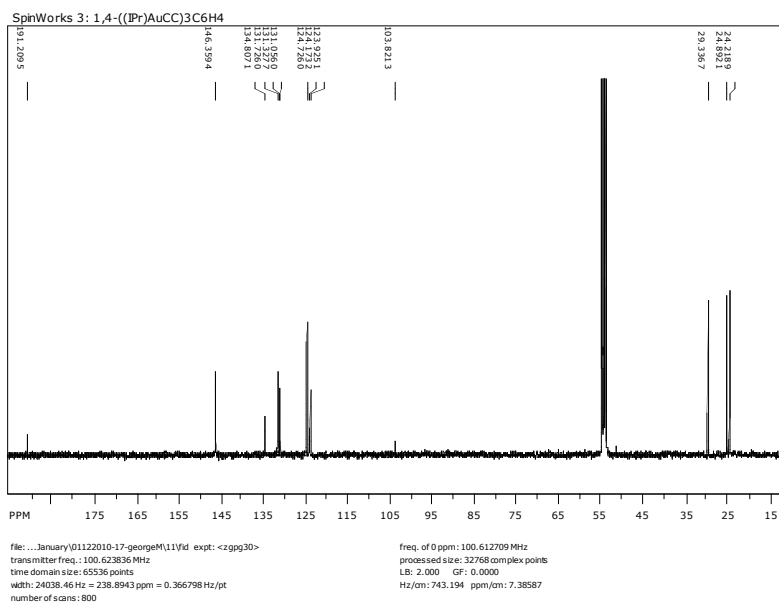

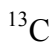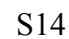

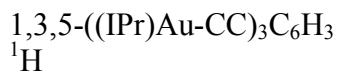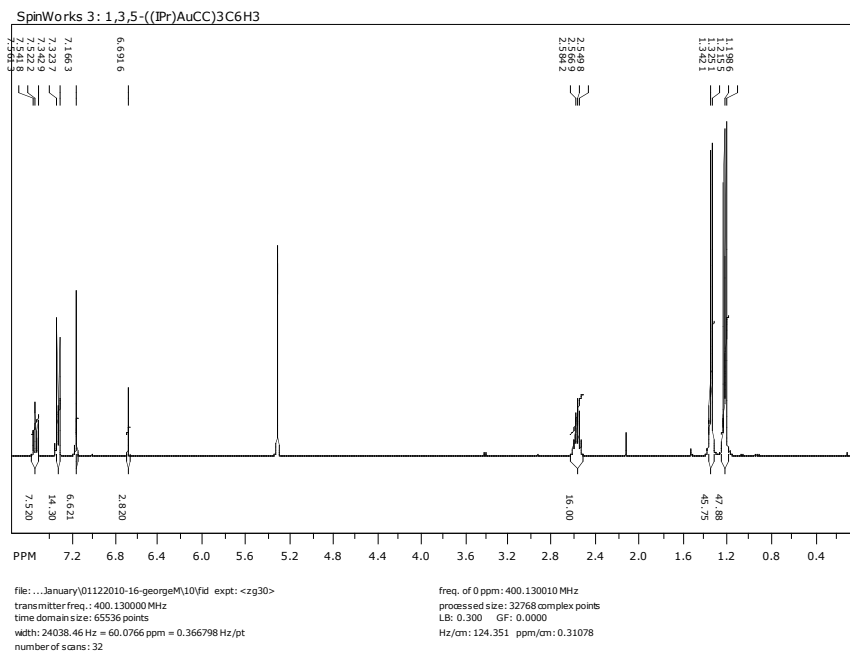

<sup>13</sup>C

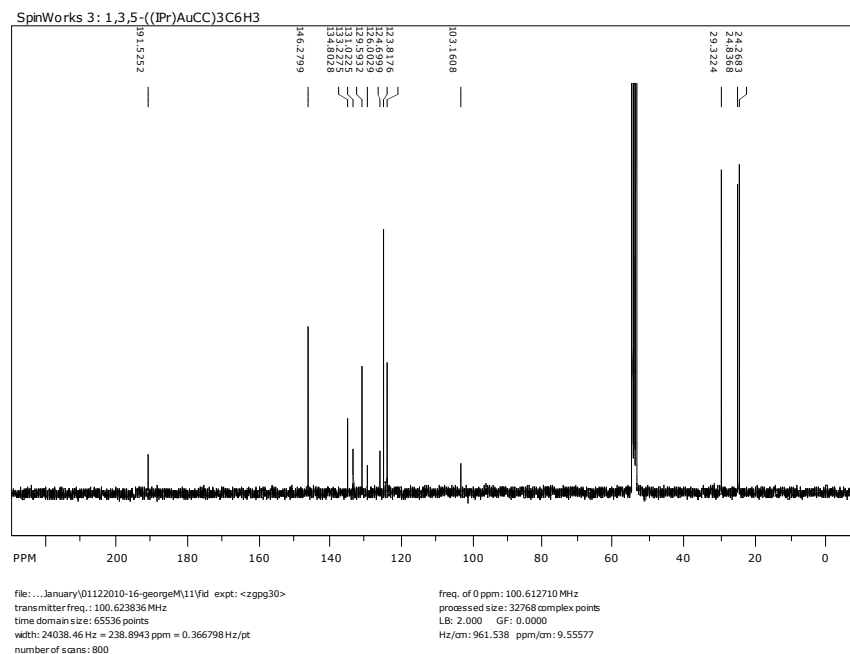

**Table S1.** Crystallographic data for complexes **3p-3r**.

| Compound reference                                                            | <b>3p</b>                                                                                       | <b>3q</b>                                                                                          | <b>3r</b>                                                                                        |
|-------------------------------------------------------------------------------|-------------------------------------------------------------------------------------------------|----------------------------------------------------------------------------------------------------|--------------------------------------------------------------------------------------------------|
| Chemical formula                                                              | C <sub>64</sub> H <sub>76</sub> Au <sub>2</sub> N <sub>4</sub> •C <sub>4</sub> H <sub>8</sub> O | C <sub>64</sub> H <sub>76</sub> Au <sub>2</sub> N <sub>4</sub> •3(C <sub>4</sub> H <sub>8</sub> O) | C <sub>93</sub> H <sub>111</sub> Au <sub>3</sub> N <sub>6</sub> •C <sub>4</sub> H <sub>8</sub> O |
| Formula Mass                                                                  | 1367.32                                                                                         | 1511.53                                                                                            | 1975.88                                                                                          |
| Crystal system                                                                | Monoclinic                                                                                      | Monoclinic                                                                                         | Monoclinic                                                                                       |
| <i>a</i> /Å                                                                   | 20.969(7)                                                                                       | 26.957(7)                                                                                          | 16.191(10)                                                                                       |
| <i>b</i> /Å                                                                   | 14.209(4)                                                                                       | 15.707(4)                                                                                          | 24.037(13)                                                                                       |
| <i>c</i> /Å                                                                   | 23.049(11)                                                                                      | 16.660(4)                                                                                          | 26.30(2)                                                                                         |
| $\alpha$ /°                                                                   | 90.00                                                                                           | 90.00                                                                                              | 90.00                                                                                            |
| $\beta$ /°                                                                    | 112.490(7)                                                                                      | 96.742(8)                                                                                          | 92.389(7)                                                                                        |
| $\gamma$ /°                                                                   | 90.00                                                                                           | 90.00                                                                                              | 90.00                                                                                            |
| Unit cell volume/Å <sup>3</sup>                                               | 6345(4)                                                                                         | 7005(3)                                                                                            | 10228(12)                                                                                        |
| Temperature/K                                                                 | 93(2)                                                                                           | 93(2)                                                                                              | 93(2)                                                                                            |
| Space group                                                                   | <i>I</i> 2/ <i>a</i>                                                                            | <i>C</i> <i>c</i>                                                                                  | <i>I</i> <i>a</i>                                                                                |
| No. of formula units per unit cell, <i>Z</i>                                  | 4                                                                                               | 4                                                                                                  | 4                                                                                                |
| No. of reflections measured                                                   | 19195                                                                                           | 21968                                                                                              | 50965                                                                                            |
| No. of independent reflections                                                | 5687                                                                                            | 9476                                                                                               | 17329                                                                                            |
| <i>R</i> <sub>int</sub>                                                       | 0.0527                                                                                          | 0.0373                                                                                             | 0.1330                                                                                           |
| Final <i>R</i> <sub><i>I</i></sub> values ( <i>I</i> > 2σ( <i>I</i> ))        | 0.0386                                                                                          | 0.0457                                                                                             | 0.1526                                                                                           |
| Final <i>wR</i> ( <i>F</i> <sup>2</sup> ) values ( <i>I</i> > 2σ( <i>I</i> )) | 0.0943                                                                                          | 0.1165                                                                                             | 0.3784                                                                                           |
| Final <i>R</i> <sub><i>I</i></sub> values (all data)                          | 0.0450                                                                                          | 0.0471                                                                                             | 0.1693                                                                                           |
| Final <i>wR</i> ( <i>F</i> <sup>2</sup> ) values (all data)                   | 0.1006                                                                                          | 0.1180                                                                                             | 0.4153                                                                                           |
| CCDC number                                                                   | 771218                                                                                          | 771219                                                                                             | 771220                                                                                           |
